# Supplementary material for: Integrative epigenetic taxonomy of primary prostate cancer
Source: PubMed Central journal article supplement (PMC6249266; doi:10.1038/s41467-018-07270-2), 2018-11-21
Supplement: 41467_2018_7270_MOESM1_ESM.pdf [file 41467_2018_7270_MOESM1_ESM.pdf]

## **Supplementary Information**

### **Integrative epigenetic taxonomy of primary prostate cancer**

Stelloo, Nevedomskaya, Kim et al.,

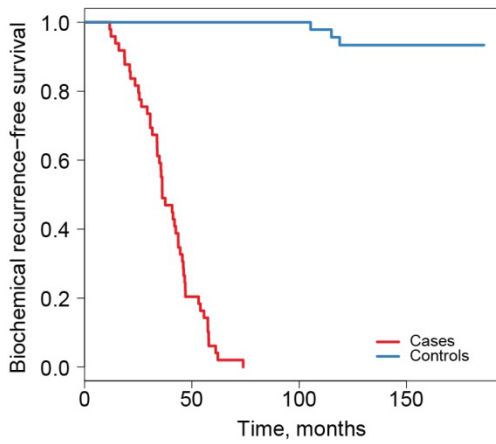

**Supplementary Figure 1: Biochemical recurrence-free survival**

Kaplan-Meier curve of biochemical recurrence-free survival between the two groups; cases and controls.

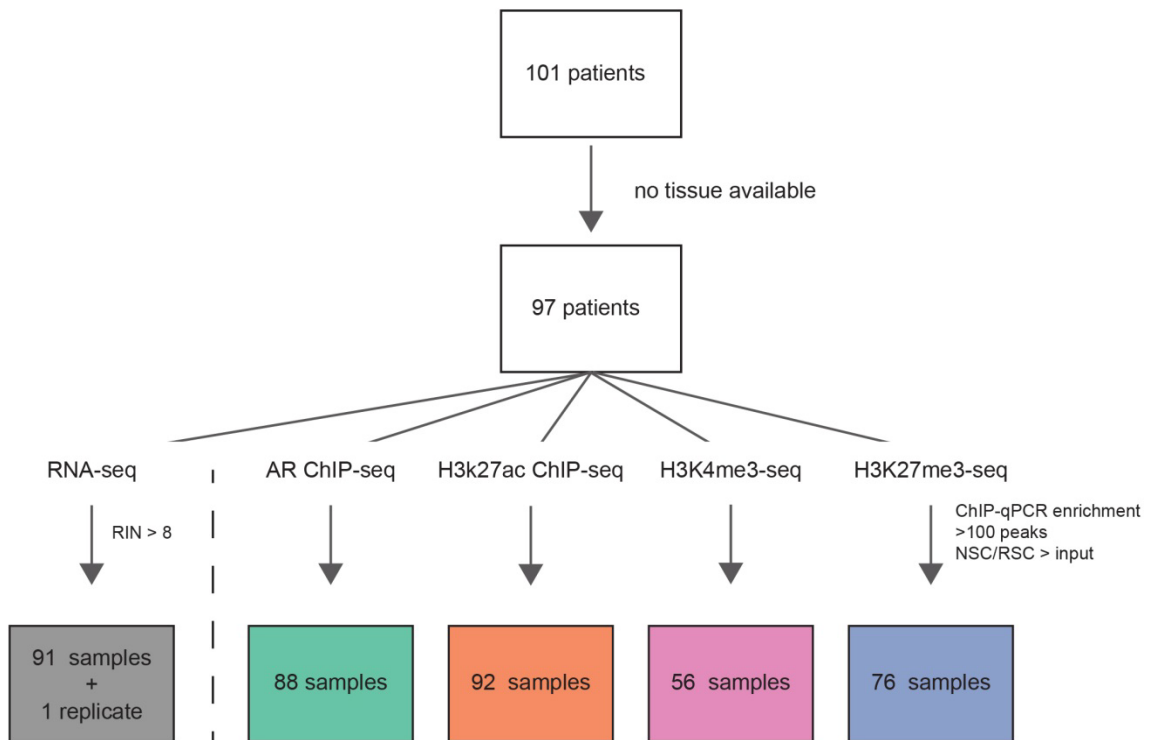

**Supplementary Figure 2: Sample flow diagram**

Flow diagram for sample quality control analyses, indicating numbers of samples passing the required cut-off values as defined for each datastream.

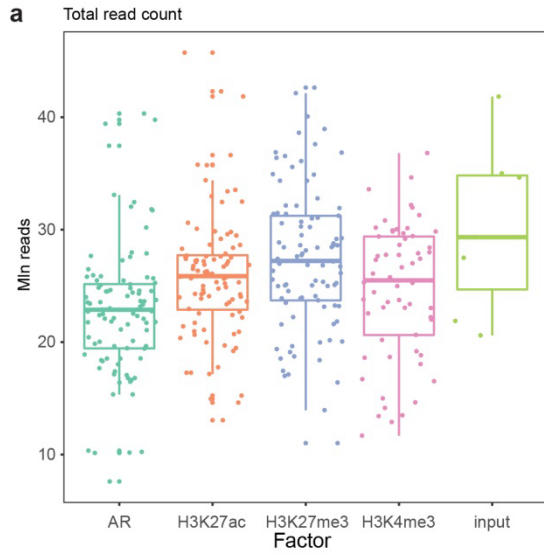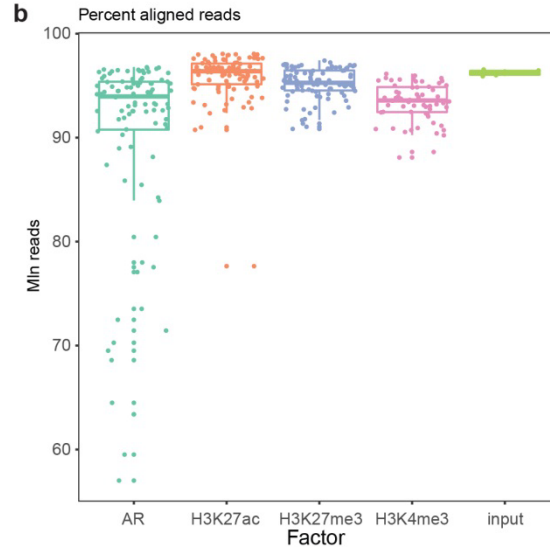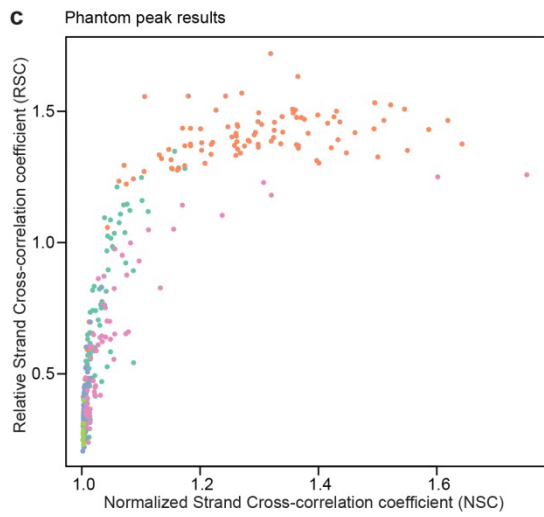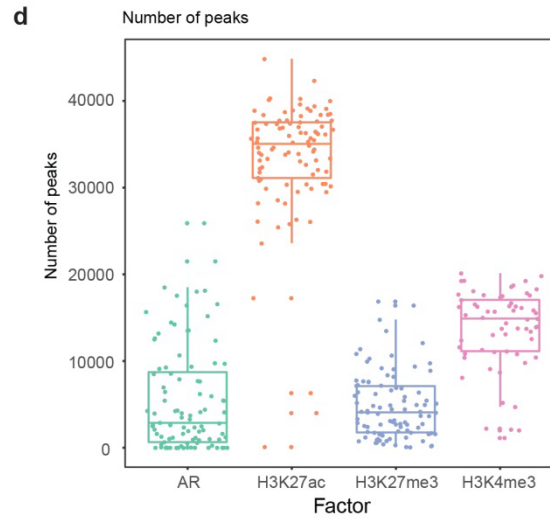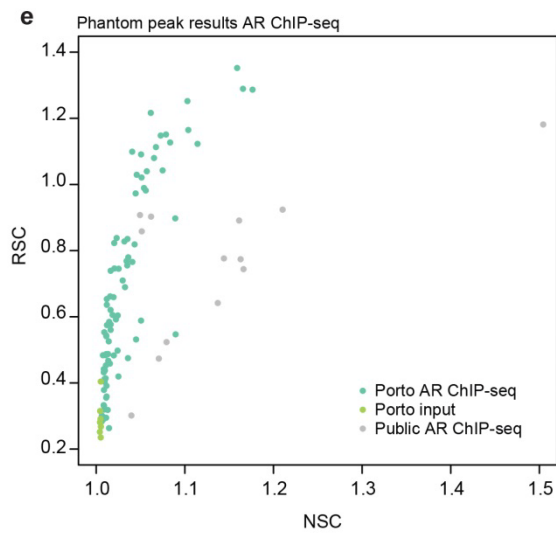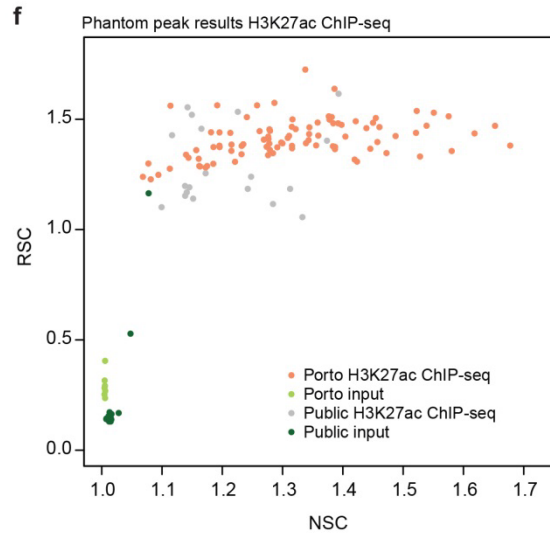

**Supplementary Figure 3: Number of reads, peaks and phantom peak results in ChIP-seq datasets of AR, H3K27ac, H3K27me3 and H3K4me3.**

- a. Boxplots of the total number of reads in millions (mln). Boxplot: median values with interquartile range.
- b. Boxplots of the percentage of aligned reads per sample.
- c. Scatter plot of normalized strand cross-correlation coefficient (NSC) scores and relative strand cross-correlation coefficient (RSC) scores for all ChIP-seq samples and inputs.
- d. Number of peaks called by both peak callers for AR, H3K27ac and H3K4me3 ChIP-seq samples.
- e. Scatter plot of NSC scores RSC scores for inputs and AR ChIP-seq samples from this study and Pomerantz et al (GSE56288).
- f. Scatter plot of NSC scores and RSC scores for H3K27ac ChIP-seq samples and inputs from this study and Kron et al (EGAS00001002496).

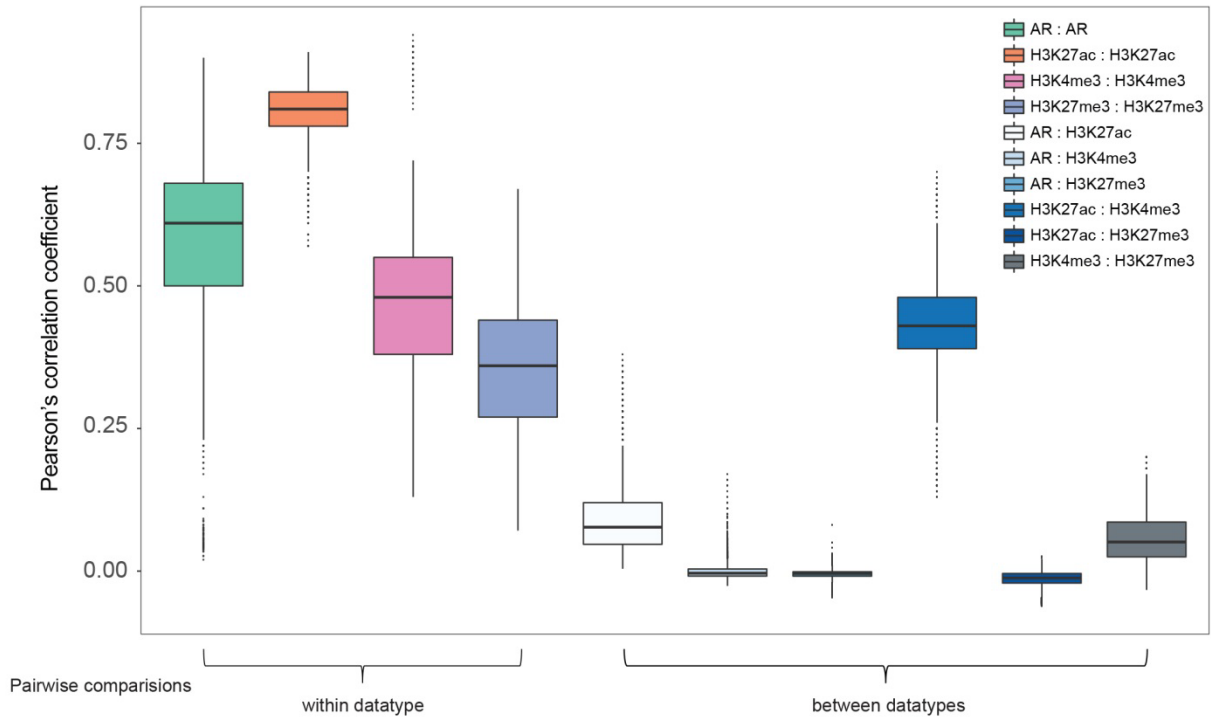

**Supplementary Figure 4: Correlations between ChIP-seq samples**

Boxplots showing the Pearson's correlation coefficients between ChIP-seq samples on the basis of called peaks. Center line, median; box limits, upper (75) and lower (25) quartiles; whiskers, 1.5x interquartile range. The correlation matrix is shown in Figure 2e.

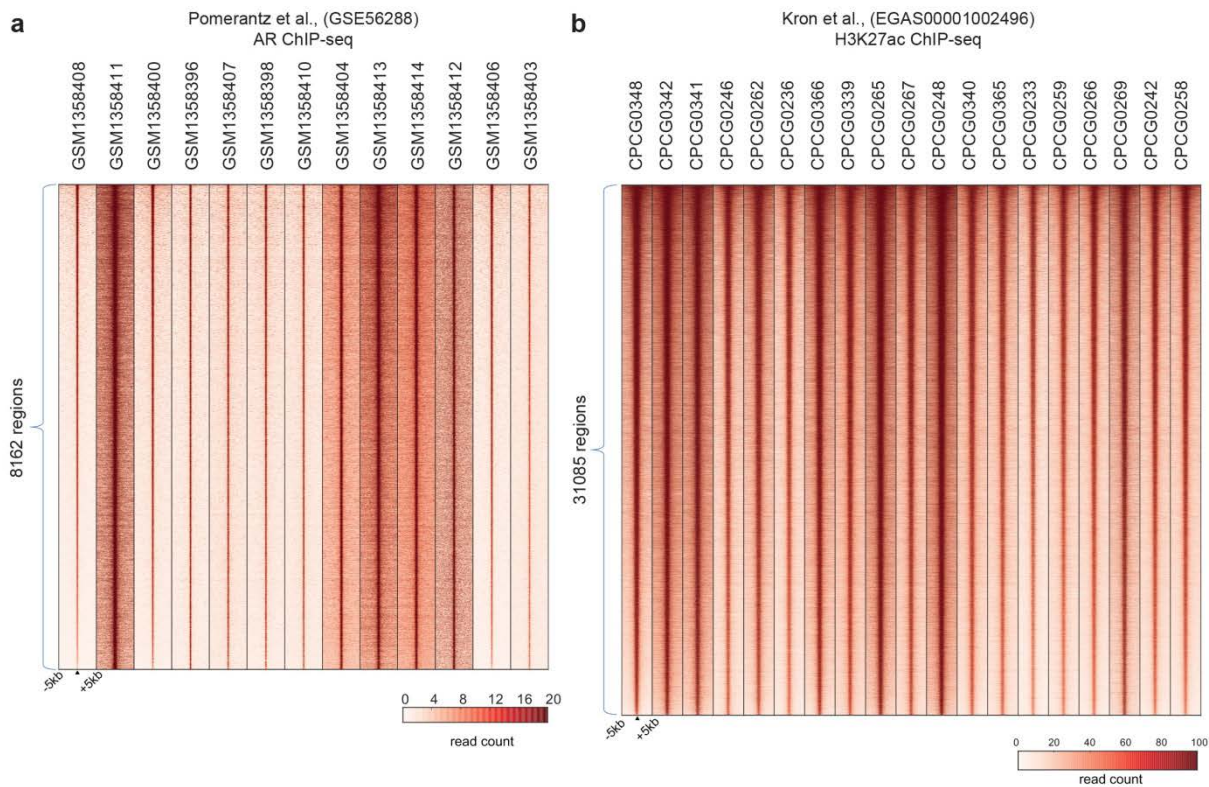

**Supplementary Figure 5: Enrichment of AR and H3K27ac from publicly available data at the consensus sites**

Heatmap of AR (a) and H3K27ac (b) ChIP-seq signal from publicly available datasets at the consensus peaksets defined on the Porto cohort. The following color scale is used: white, no enrichment; red, high enrichment.

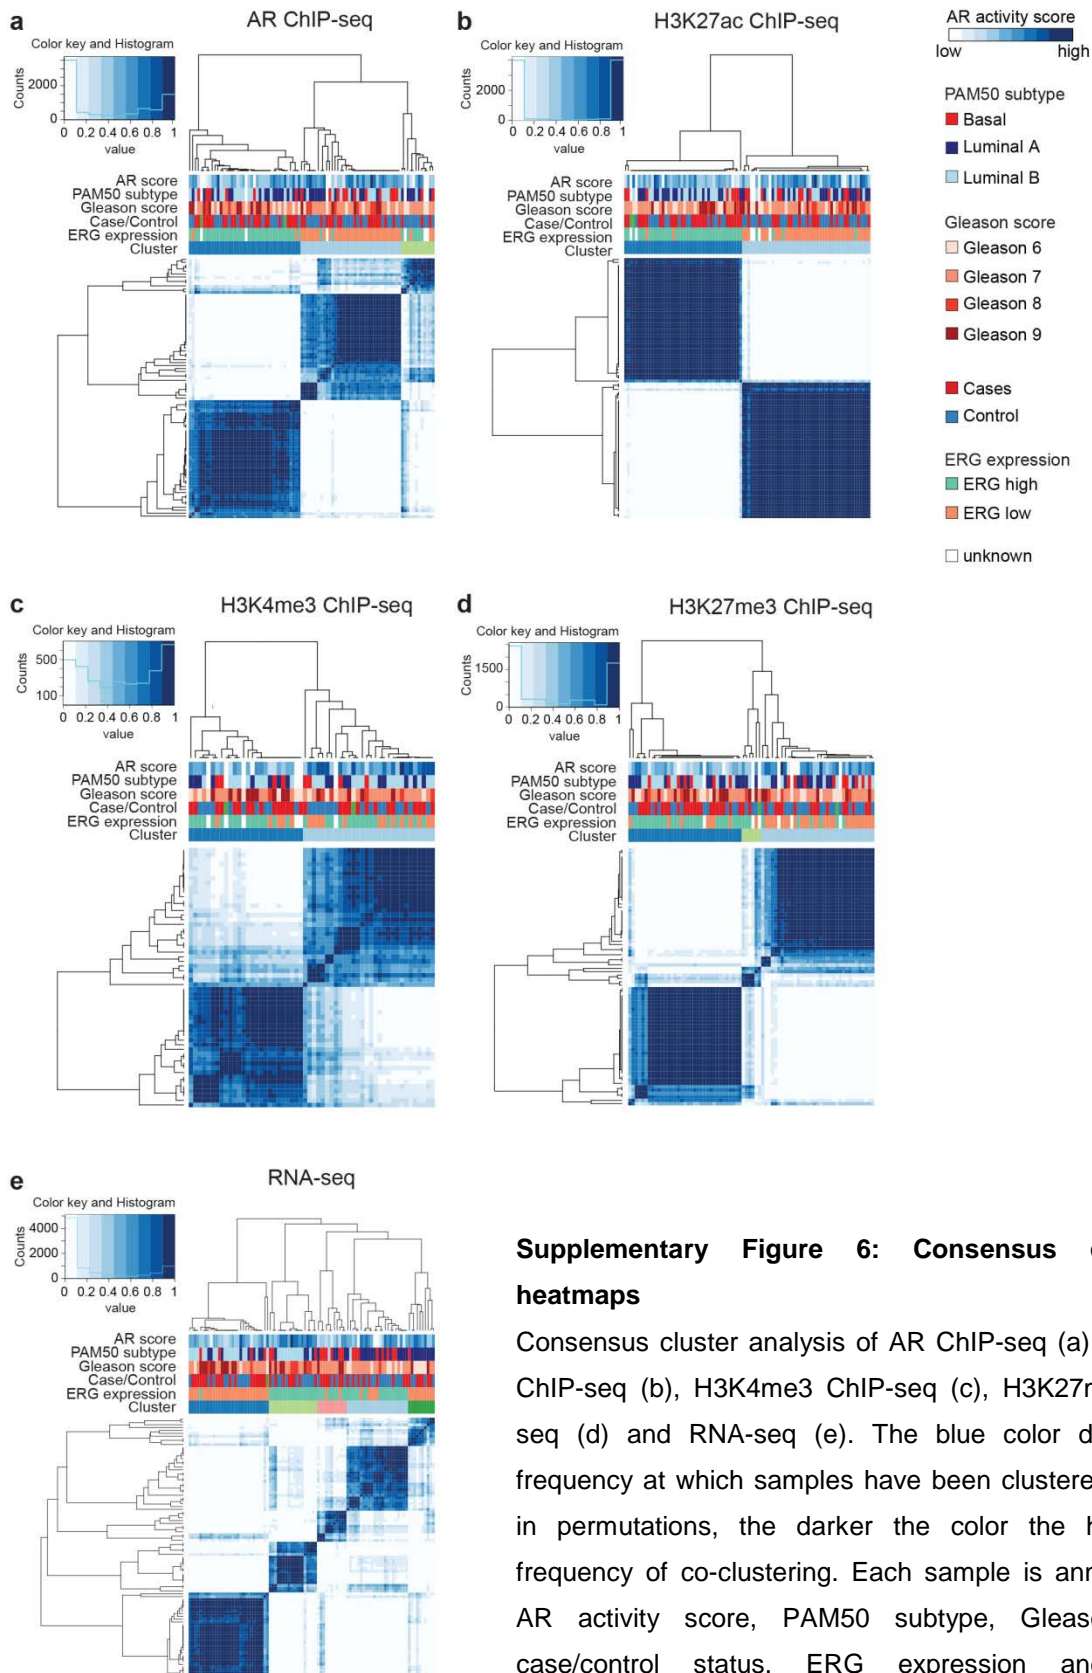

**Supplementary Figure 6: Consensus clustering heatmaps**

Consensus cluster analysis of AR ChIP-seq (a), H3K27ac ChIP-seq (b), H3K4me3 ChIP-seq (c), H3K27me3 ChIP-seq (d) and RNA-seq (e). The blue color depicts the frequency at which samples have been clustered together in permutations, the darker the color the higher the frequency of co-clustering. Each sample is annotated for AR activity score, PAM50 subtype, Gleason score, case/control status, ERG expression and cluster assignment.

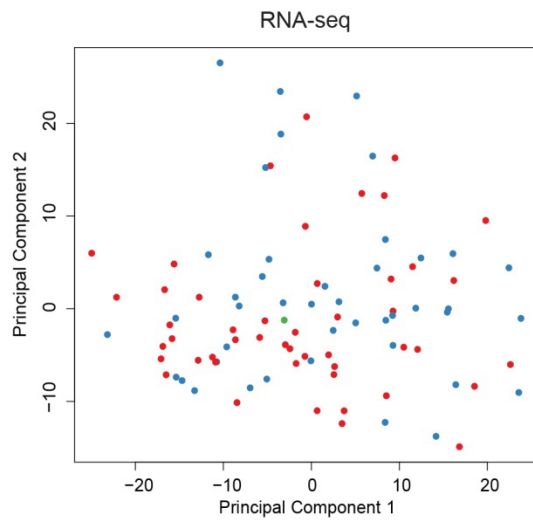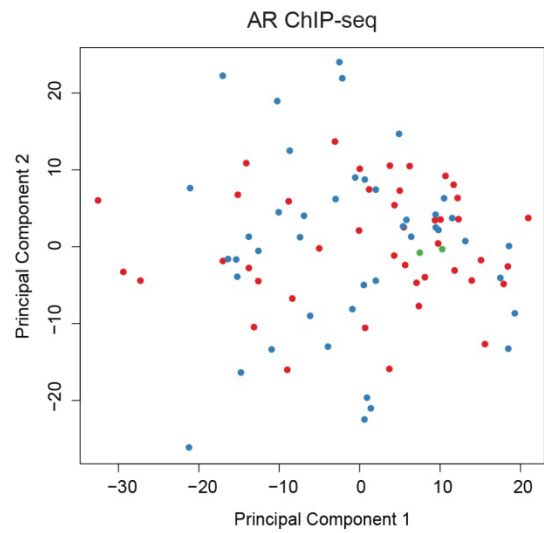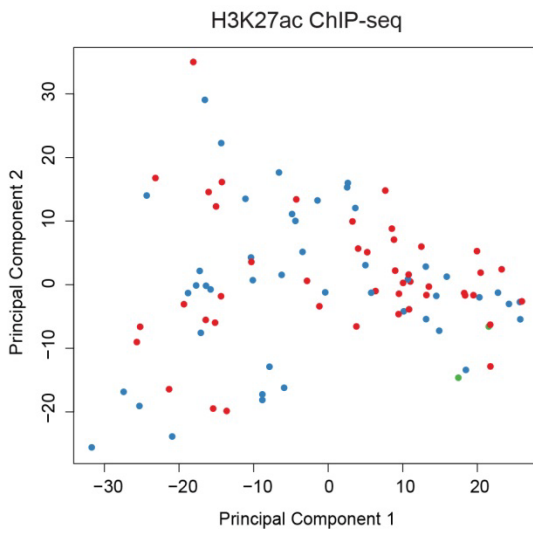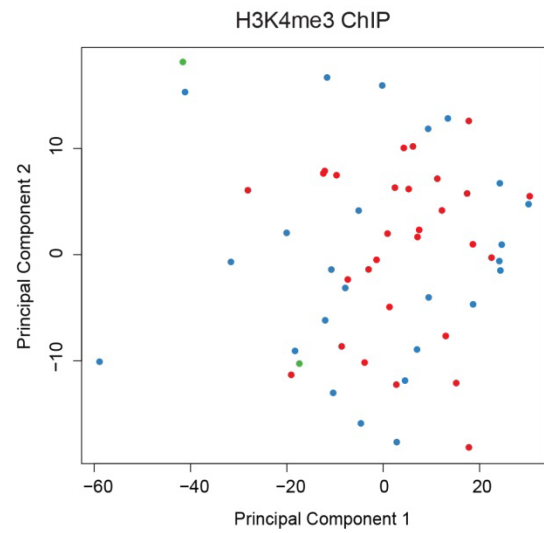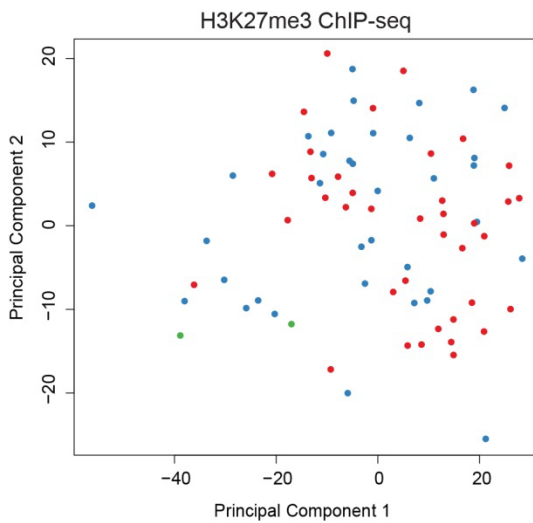

● Cases  
 ● Control  
 ● No follow-up

**Supplementary Figure 7: PCA cases controls**

PCA scores plot for RNA expression, AR binding, H3K27ac, H3K4me3 and H3K27me3 ChIP-seq signal, based on the top 1000 most-varying genes/regions across the samples. Samples are colored according to case (red)/ control (blue) status.



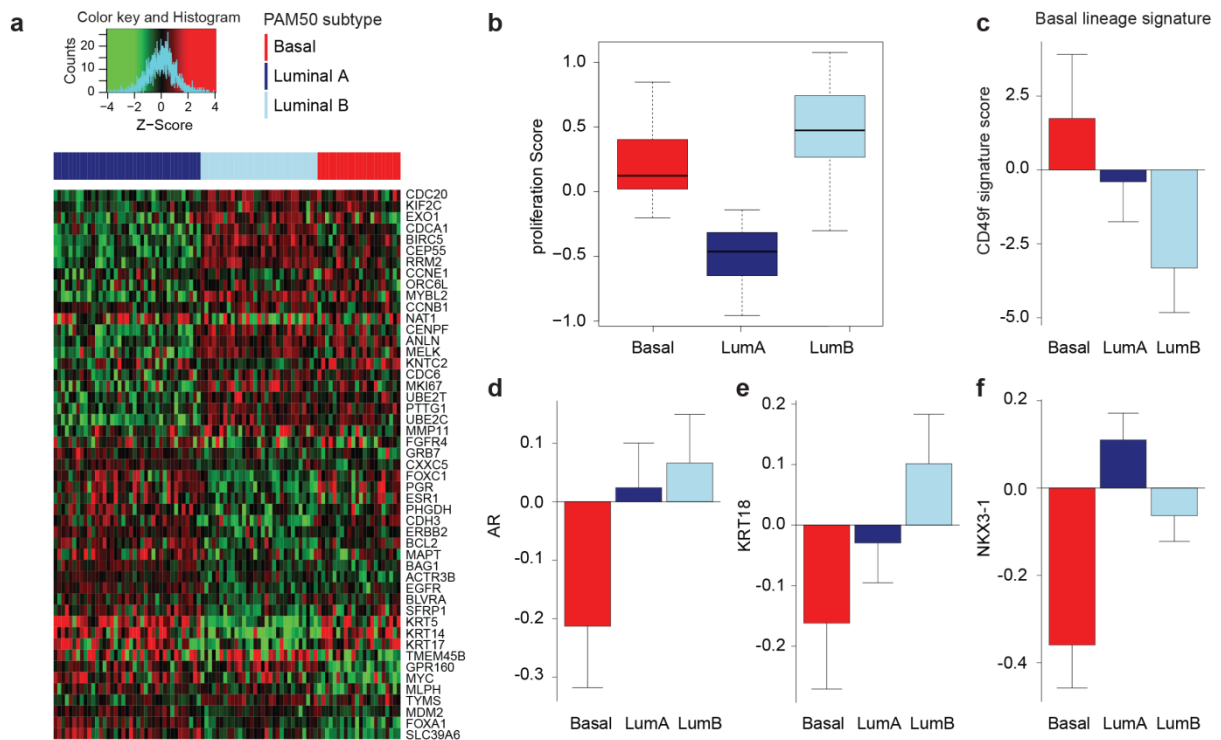

**Supplementary Figure 8: PAM50 subtyping**

- a.** Heatmap depicting PAM50 classification for Luminal A (dark blue), Luminal B (light blue) or Basal (red) subtypes for each patient. The genes are ordered as shown in Zhao et al., 2017. Color scale: red indicates high expression and green low expression (z-score).
- b.** Boxplot showing proliferation score across the three PAM50 subtypes. Center line, median; box limits, upper (75) and lower (25) quartiles; whiskers, 1.5x interquartile range.
- c-f.** Bar plots showing basal lineage CD49f signature score (**c**), AR expression (**d**), and expression of luminal lineage markers KRT18 (**e**) and NKX3-1 (**f**) across the three PAM50 subtypes. Mean ( $\pm$ SE) values of median centered log-transformed gene expression is shown.

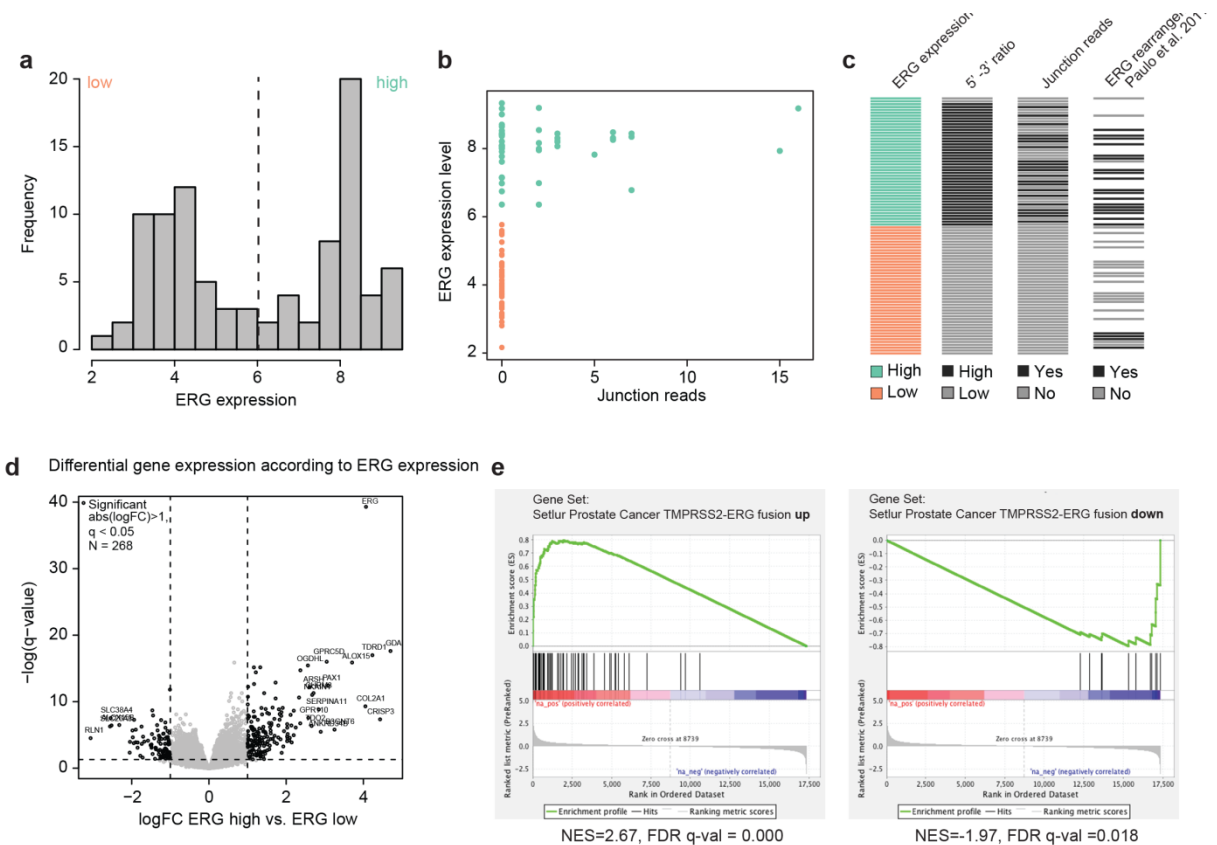

### Supplementary Figure 9: ERG fusion status

- Distribution of ERG expression. The x-axis shows the  $\log_2$  expression of ERG. The threshold between high and low ERG expression is shown by the dotted line.
- The number of fusion junction spanning reads are plotted on the x-axis and the  $\log_2$  ERG expression on the y-axis.
- Summary of ERG fusion status per sample (rows) measured by either gene profile expression level, 5'-3' transcript ratio, the presence of fusion junction spanning reads and FISH/Taqman <sup>12</sup>.
- Volcano plot showing differentially expressed genes between low ERG expressing tumors and high ERG expressing tumors. The negative  $\log_{10} p$  values (y-axis) are plotted against the  $\log_2$  fold change of expression (x-axis).
- Enrichment plots for MSigDB Setlur\_prostate\_cancer\_tmprss2\_erg\_fusion\_up and \_down genesets.

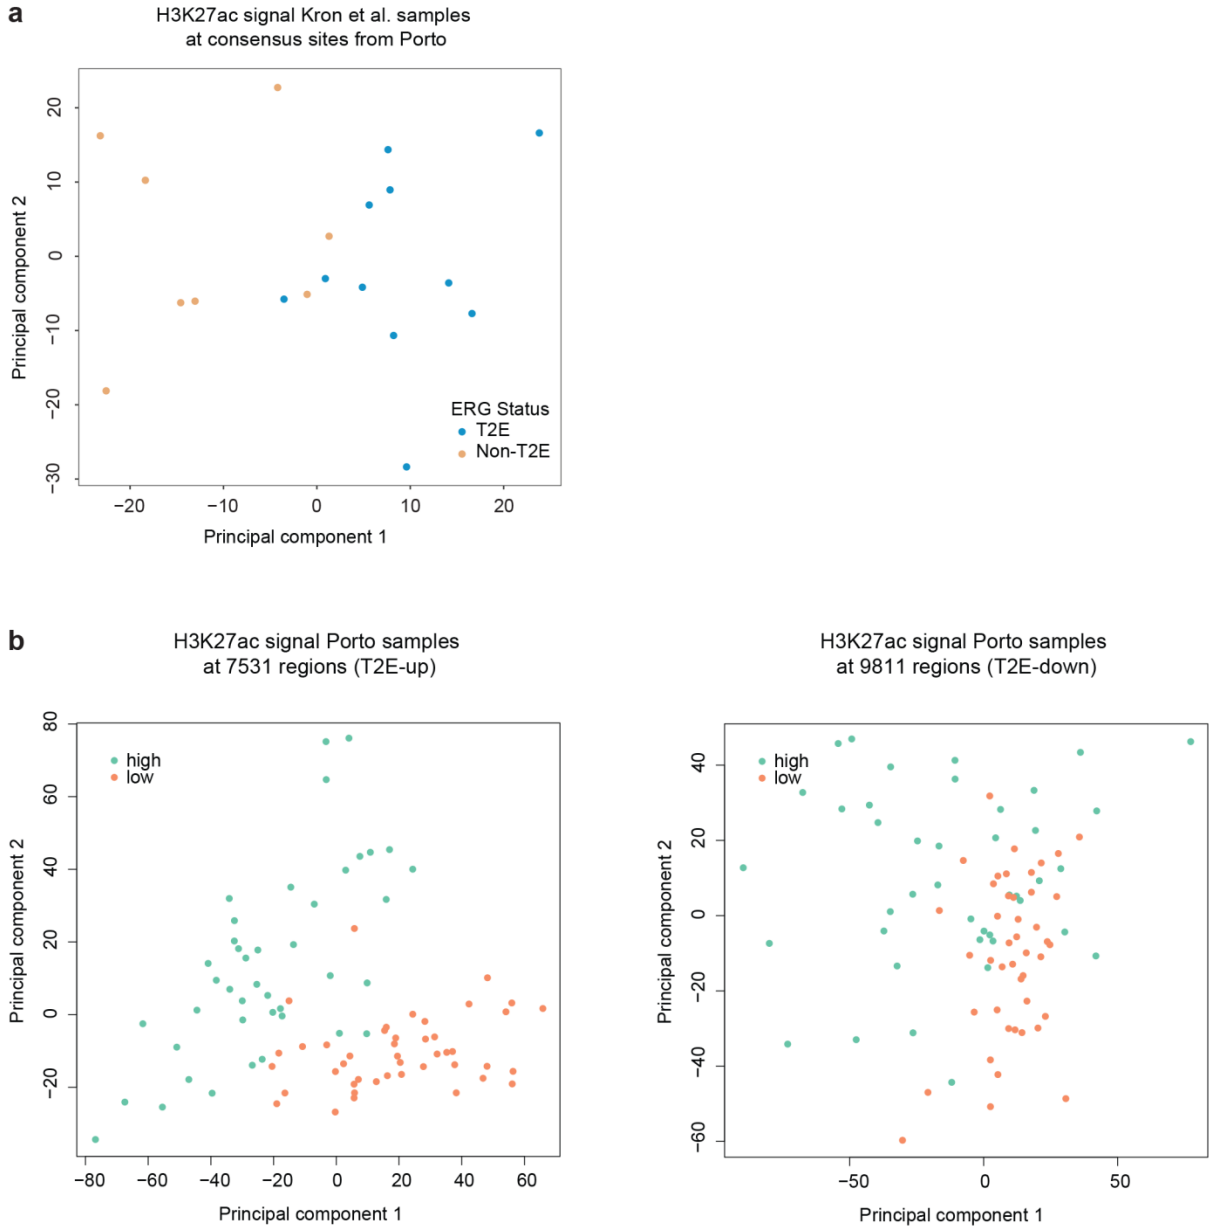

**Supplementary Figure 10: Comparison of ChIP-seq data to discriminate samples on ERG status**

- PCA scores plot based on publicly available H3K27ac ChIP-seq signal at the 1000 regions defined in this study. Samples are colored according to ERG fusion status. (T2E: TMPRSS2-ERG fusion)
- PCA scores plot for AR ChIP-seq signal (Porto samples) at the regions defined in the previous study, either 7531 regions (T2E-up) or 9811 region (T2E-down). Samples are colored according to ERG expression.

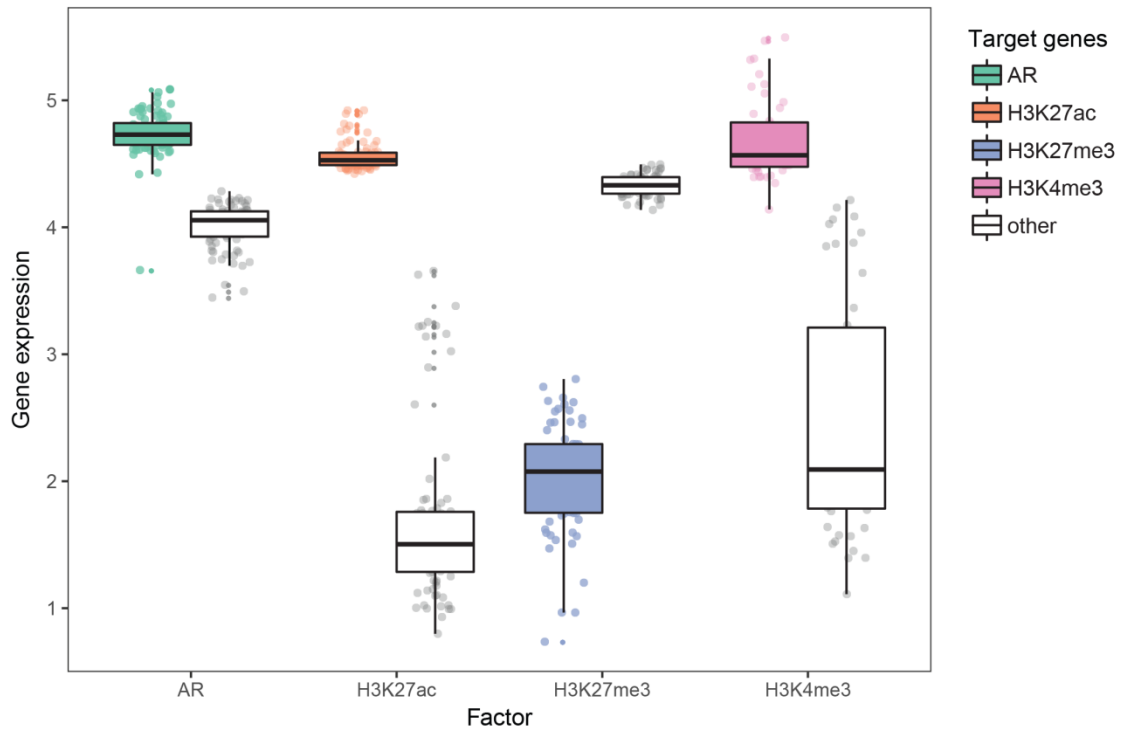

**Supplementary Figure 11: Gene expression level of genes with proximal AR or H3K27ac, H3K27me3 and H3K4me3 chromatin marks.**

Boxplots of per-patient average expression levels of potential target genes and the other genes (gray) for AR (green), H3K27ac (orange), H3K24me3 (purple), and H3K4me3 (pink). Target genes are defined as genes with called peak 20kb upstream of its transcription starting site and gene body. Center line, median; box limits, upper (75) and lower (25) quartiles; whiskers, 1.5x interquartile range.

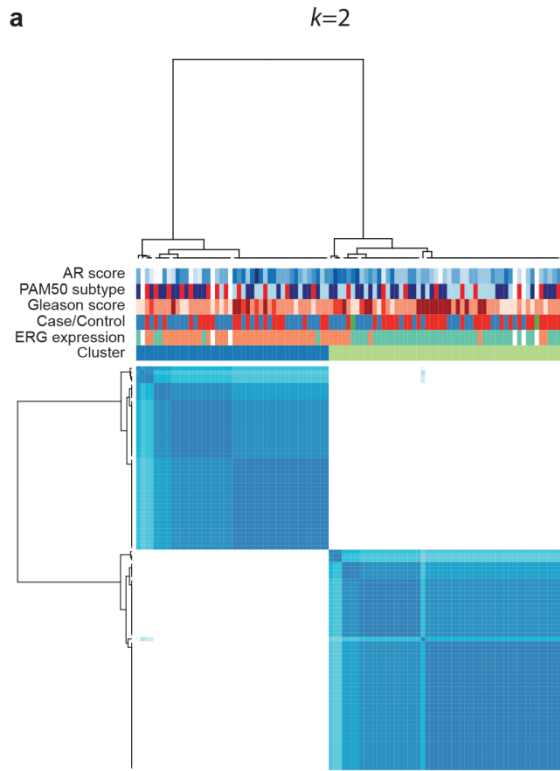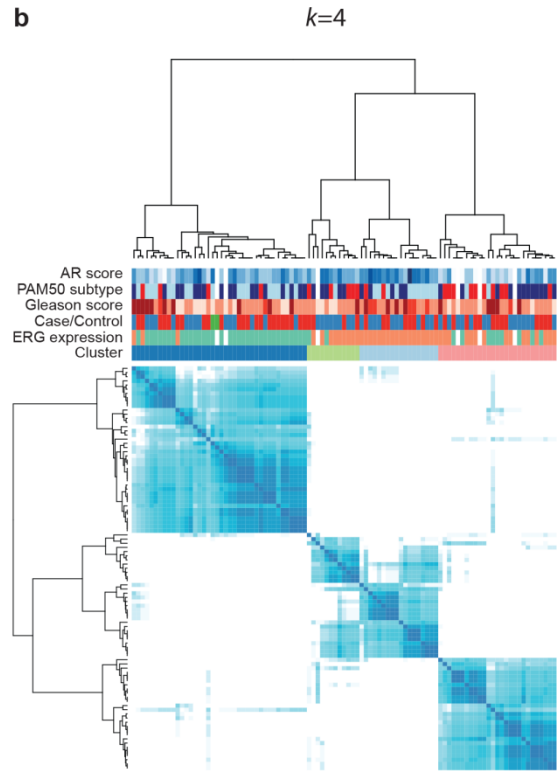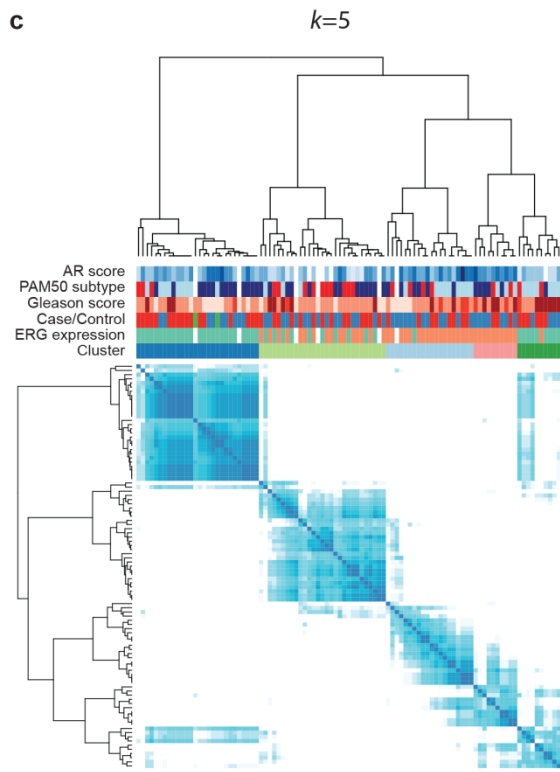

AR activity score  
low high

PAM50 subtype

Basal

Luminal A

Luminal B

Gleason score

Gleason 6

Gleason 7

Gleason 8

Gleason 9

Cases

Control

No follow-up

ERG expression

ERG high

ERG low

unknown

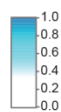

### **Supplementary Figure 12: Integrative clustering**

Integrative cluster analysis using RNA-seq and ChIP-seq datasets for different cluster sizes of  $k=2$  (**a**),  $k=4$  (**b**) and  $k=5$  (**c**). The darker the color blue, the higher the frequency of co-clustering of the samples. Each sample is annotated for AR activity score, PAM50 subtype, Gleason score, case/control status, ERG expression and cluster.

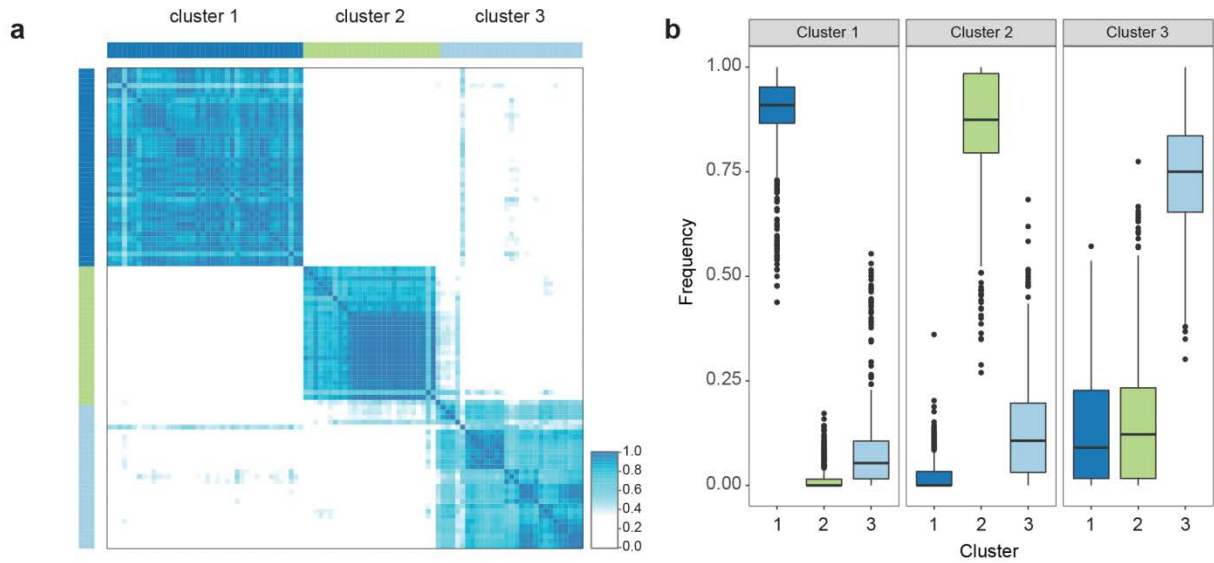

**Supplementary Figure 13: Stability analysis of the three integrative clusters**

- a. Heatmap shows frequency of sample pairs occurring in the same cluster in outcomes of 100 integrative clustering analysis with 80% subsampling. Rows and columns are samples, and the more frequently samples occur in the same cluster, the darker the color blue.
- b. Boxplots show stability of the three identified clusters. y axis is the frequency of classifying sample pairs in the same cluster and pairs are divided by final cluster assigned to the samples in pairs (x axis and three panels). Center line, median; box limits, upper (75) and lower (25) quartiles; whiskers, 1.5x interquartile range.

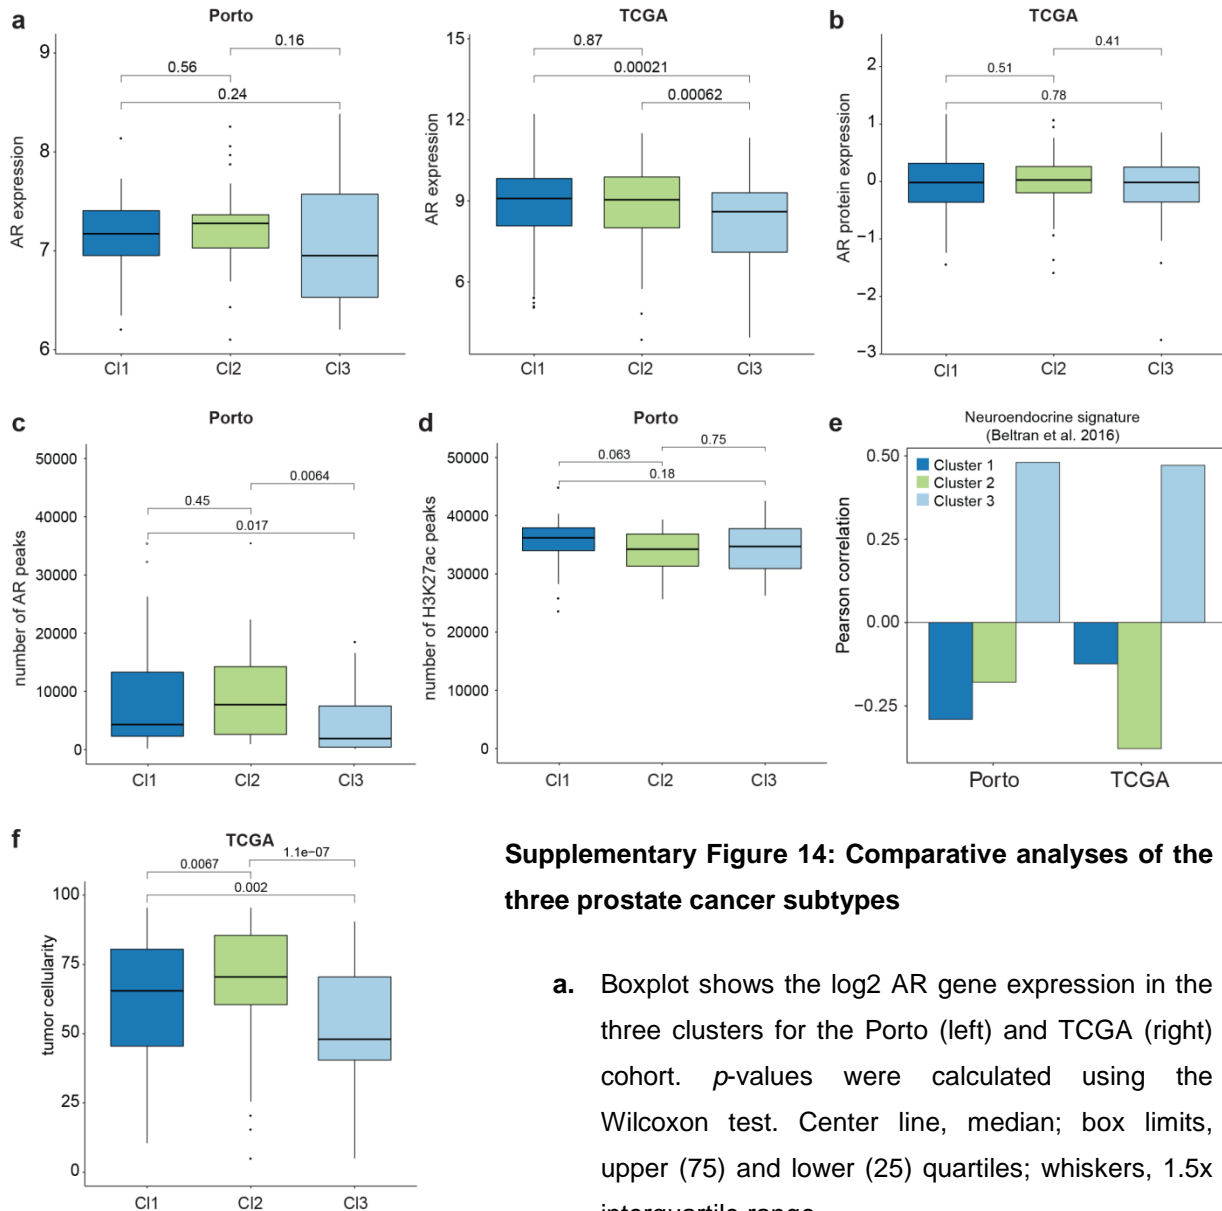

**Supplementary Figure 14: Comparative analyses of the three prostate cancer subtypes**

- a.** Boxplot shows the log<sub>2</sub> AR gene expression in the three clusters for the Porto (left) and TCGA (right) cohort. *p*-values were calculated using the Wilcoxon test. Center line, median; box limits, upper (75) and lower (25) quartiles; whiskers, 1.5x interquartile range.
- b.** Boxplot shows the AR protein expression in TCGA (RPPA). *p*-values were calculated using the Wilcoxon test.
- c.** Boxplot shows the number of AR peaks in the three clusters. *p*-values were calculated using the Wilcoxon test.
- d.** Boxplot shows the number of H3K27ac peaks in the three clusters. *p*-values were calculated using the Wilcoxon test.
- e.** Barplot shows the Pearson correlation of the neuroendocrine gene signature score in the three clusters for both the Porto and TCGA cohort.
- f.** Boxplot shows the tumor percentage in the three clusters for the TCGA cohort. *p*-values were calculated using the Wilcoxon test.



**a**

Synaptophysin

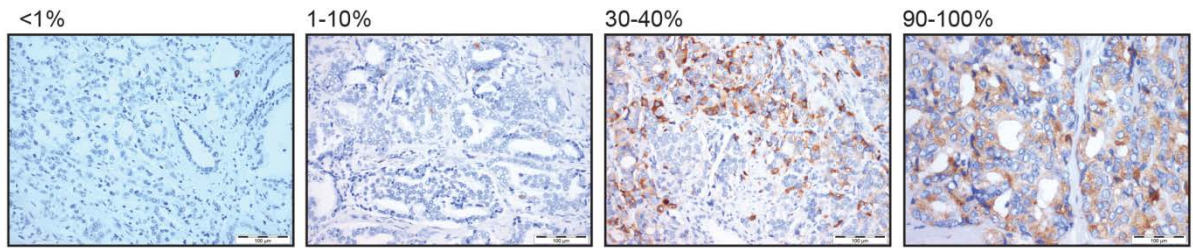

Chromogranin

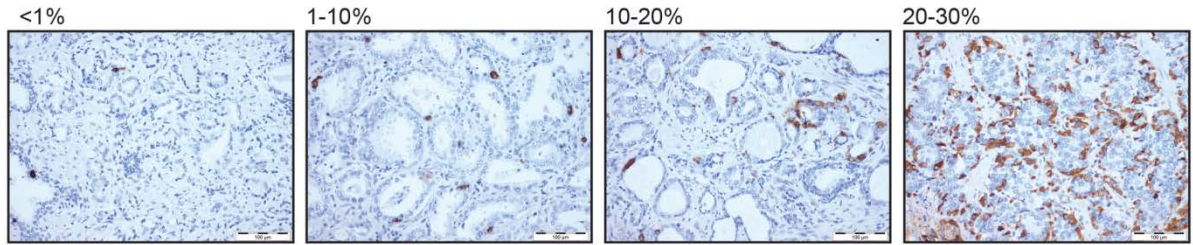

**b**

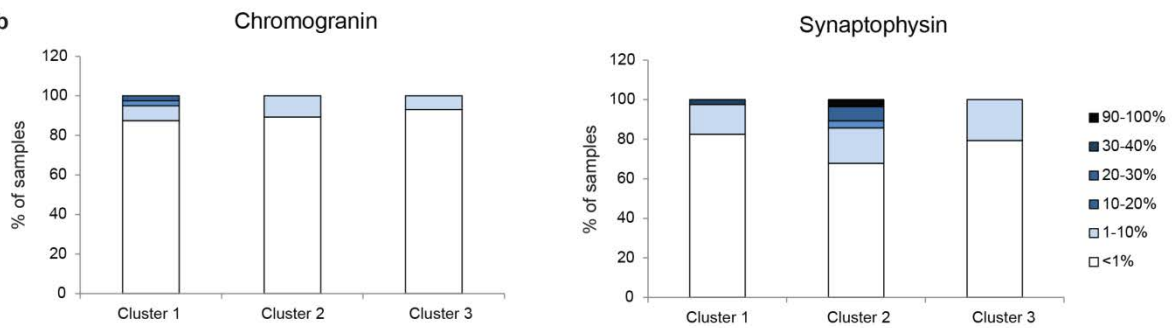

**c**

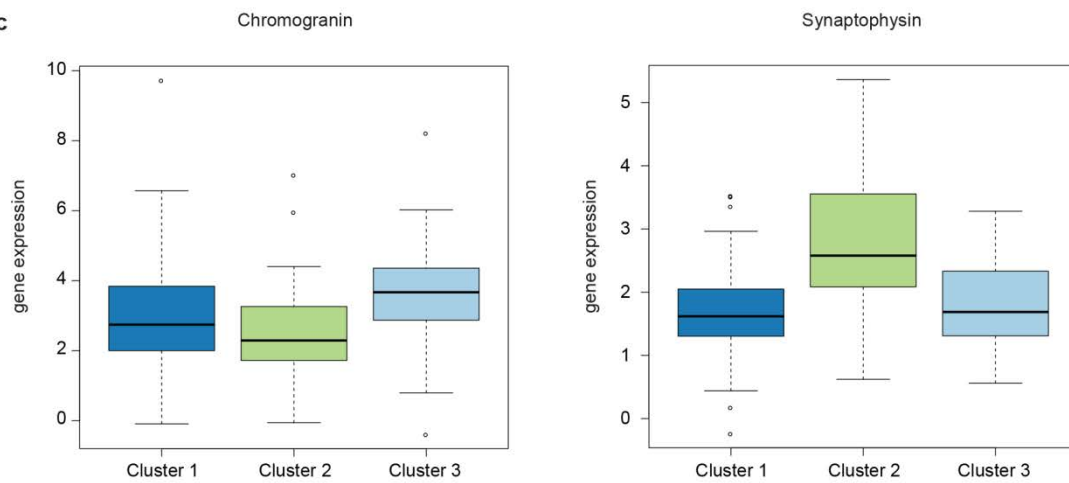

**Supplementary Figure 15: Expression of neuroendocrine markers**

- a. Representative immunohistochemical staining for chromogranin and synaptophysin. Scale bars, 100  $\mu\text{m}$ .
- b. Stacked bar charts comparing percentage of positive cells for chromogranin and synaptophysin expression across the three subtypes.
- c. Boxplot shows the log<sub>2</sub> chromogranin and synaptophysin gene expression in the three clusters.

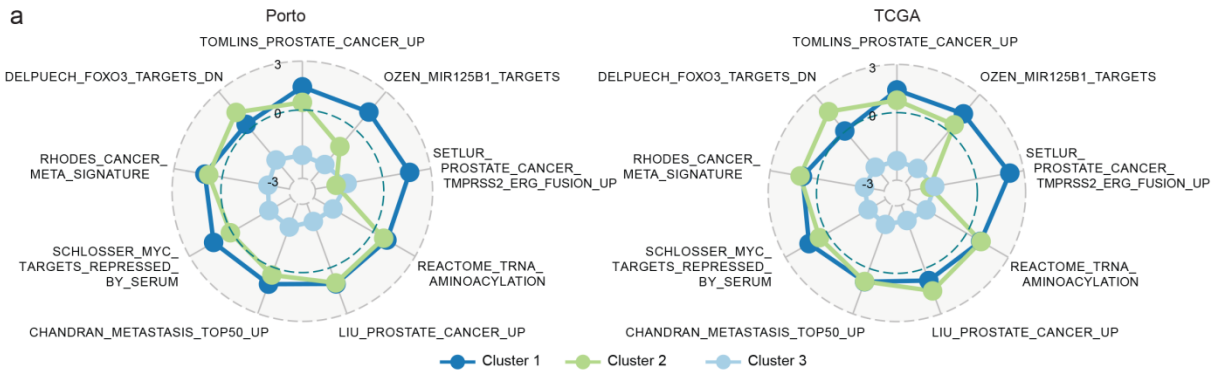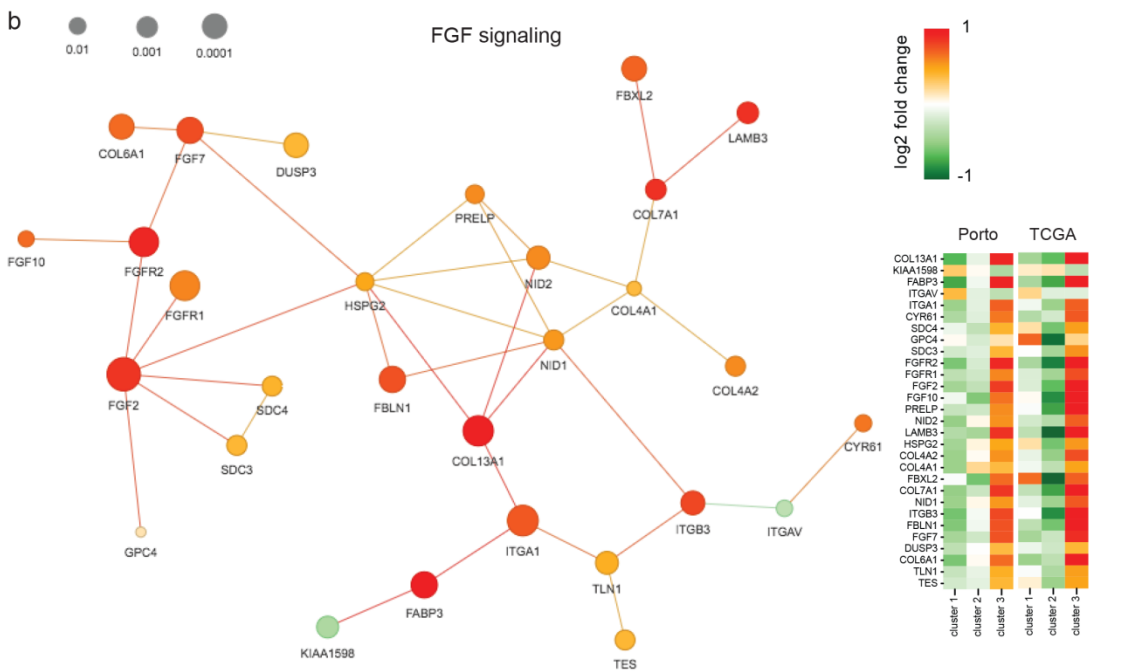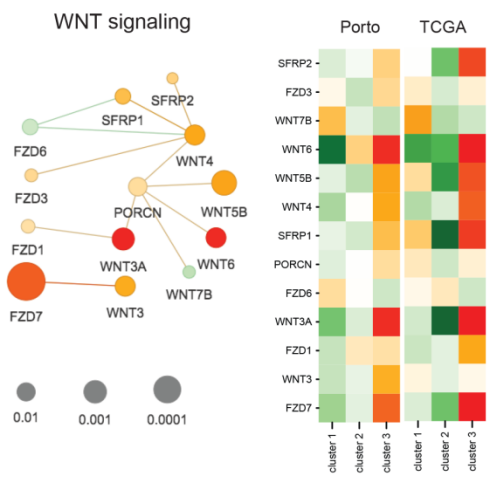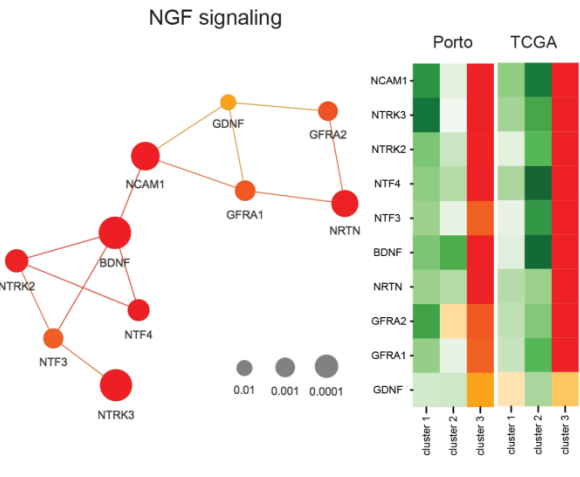

**Supplementary Figure 16: Gene expression-based characterization for the three prostate cancer subtypes**

- a.** Normalized enrichment scores (NES) for top gene sets enriched ( $FDR < 0.2$ ) in any of the three clusters, represented in a radar plot for the Porto (left) and TCGA cohort (right). NES for each cluster is indicated with a line with the corresponding color.
- b.** Differential regulatory networks identified by Hotnet2 for cluster 3. The size and color of nodes indicate FDR and  $\log_2$  fold-change, respectively, obtained from differential gene expression analysis between cluster 3 relative to the other two.  $\log_2$  fold changes of the genes between the clusters obtained from both Porto and TCGA cohort are indicated in the heatmaps.
