# Supplementary material for: Integrative epigenetic taxonomy of primary prostate cancer
Source: PubMed Central journal article supplement (PMC6249266; doi:10.1038/s41467-018-07270-2), 2018-11-21
Supplement: 41467_2018_7270_MOESM3_ESM.pdf [file 41467_2018_7270_MOESM3_ESM.pdf]

## **Description of Additional Supplementary Files**

File Name: Supplementary Data 1

Description: ChIP-seq quality control metrics

File Name: Supplementary Data 2

Description: FRiP score and number of peaks from publicly available H3K27ac ChIP-seq samples

File Name: Supplementary Data 3

Description: List of 285 differentially expressed genes between cluster 1, 2 and 3

File Name: Supplementary Data 4

Description: List of significantly enriched gene sets

File Name: Supplementary Data 5.

Description: The eight largest networks enriched in cluster 3
